# Supplementary material
Source: publisher figshare collection journal article supplement (https://karger.figshare.com/ndownloader/files/36522516)
Supplement: Supplementary file 1 [file 36522516]

| **Supplemental table 2. Pathological findings of IgAN in patients with eGFR ≥60** | | | | |
| --- | --- | --- | --- | --- |
|  |  |  |  |  |
| **Characteristic** | **Total (N=74)** | **Serum UMOD ≤145 (ng/ml)** | **Serum UMOD >145 (ng/ml)** | **P*-*value** |
| **(N=54)** | **(N=54)** |
|  |  |  |  |  |
| Histological grade, N (%) |  |  |  | 0.135 |
| I | 50 (68) | 21 (57) | 29 (78) |  |
| II | 18 (24) | 12 (32) | 6(16) |  |
| III | 6 (8) | 13 (24) | 2 (4) |  |
| Ⅳ | 0 (0) | 0 (0) | 0 (0) |  |
| Oxford classification |  |  |  |  |
| M score (M1), N (%) | 37 (50) | 24 (65) | 13 (35) | 0.02 |
| E score (E1), N (%) | 17 (23) | 12 (32) | 5 (14) | 0.096 |
| S score (S1), N (%) | 19 (26) | 9 (24) | 10 (27) | 1.00 |
| T score (T1, 2), N (%) | 1 (1) | 1 (3) | 0 (0) | 1.00 |
|  |  |  |  |  |
|  |  |  |  |  |
| Abbreviations: M, mesangial hypercellularity; E, endocapillary hypercellularity; S, segmental glomerulosclerosis; T, tubular atrophy/Intestitial fibrosis. | | | | |
|
| All values are expressed as n (%). | | | | |
